# Supplementary material for: Analysis of Chaperone mRNA Expression in the Adult Mouse Brain by Meta Analysis of the Allen Brain Atlas
Source: PLoS One. 2010 Oct 28;5(10):e13675. doi: 10.1371/journal.pone.0013675 (PMC2965669; doi:10.1371/journal.pone.0013675)
Supplement: Table S3 — Hyperlinks to ABA data on 30 differentially expressed chaperones. This table lists the 30 variably expressed genes and the webpage address from the ABA. Each webpage address shows the primary data we used to compile our lists and determine the variability in expression levels. (0.03 MB XLS) [file pone.0013675.s008.xls]

## Sheet: Sheet1
	Hspa12a	http://mouse.brain-map.org/brain/Hspa12a.html?ispopup=1
	Dnajb1	http://mouse.brain-map.org/brain/Dnajb1.html?ispopup=1
	Dnajb2	http://mouse.brain-map.org/brain/Dnajb10.html?ispopup=1
	Dnajc7	http://mouse.brain-map.org/brain/Dnajc7.html?ispopup=1
	Dnajc28	http://mouse.brain-map.org/brain/ORF28.html?ispopup=1
	Dnajc29	http://mouse.brain-map.org/brain/Sacs.html?ispopup=1
	Nudc	http://mouse.brain-map.org/brain/Nudc.html?ispopup=1
	Ptges3	http://mouse.brain-map.org/brain/Ptges3.html?ispopup=1
	Ptplad1	http://mouse.brain-map.org/brain/Ptplad1.html?ispopup=1
	Tomm70a	http://mouse.brain-map.org/brain/Tomm70a.html?ispopup=1
	Fkbp1b	http://mouse.brain-map.org/brain/Fkbp1b.html?ispopup=1
	Fkbp5	http://mouse.brain-map.org/brain/Fkbp5.html?ispopup=1
	Fkbp16	http://mouse.brain-map.org/brain/Aip.html?ispopup=1
	Ttc10	http://mouse.brain-map.org/brain/Ift88.html?ispopup=1
	Ttc11	http://mouse.brain-map.org/brain/Fis1.html?ispopup=1
	Ttc14	http://mouse.brain-map.org/brain/Ttc14.html?ispopup=1
	Ttc19	http://mouse.brain-map.org/brain/Ttc19.html?ispopup=1
	Ttc35	http://mouse.brain-map.org/brain/4921531G14Rik.html?ispopup=1
	Crym	http://mouse.brain-map.org/brain/Crym.html?ispopup=1
	Atad1	http://mouse.brain-map.org/brain/Atad1.html?ispopup=1
	Atad4	http://mouse.brain-map.org/brain/Atad4.html?ispopup=1
	Katnal1	http://mouse.brain-map.org/brain/Katnal1.html?ispopup=1
	Lonp	http://mouse.brain-map.org/brain/1300002A08Rik.html?ispopup=1
	Psmc3	http://mouse.brain-map.org/brain/Psmc3.html?ispopup=1
	Psmc6	http://mouse.brain-map.org/brain/Psmc6.html?ispopup=1
	Yme1l1	http://mouse.brain-map.org/brain/Yme1l1.html?ispopup=1
	Pfdn2	http://mouse.brain-map.org/brain/Pfdn2.html?ispopup=1
	Pfdn5	http://mouse.brain-map.org/brain/Pfdn5.html?ispopup=1
	Hspbp1	http://mouse.brain-map.org/brain/1500019G21Rik.html?ispopup=1
	Timm44	http://mouse.brain-map.org/brain/Timm44.html?ispopup=1
